# Supplementary material
Source: publisher site journal article supplement (https://en-cdn.bio-protocol.org/attached/file/20200330/Supplementary%20Analysis%20mock%20metagenome.docx)
Supplement: Supplementary file 1 [file Supplementary%20Analysis%20mock%20metagenome.docx]

**Supplementary Analysis**

**SA1. Validation of our HoSeIn workflow with a mock metagenome.**

We validated our workflow by analysing a mock metagenome (BMock12) (Sevim et al., 2019) and comparing the results we obtained with those reported for the synthetic metagenome (Sevim et al., 2019). For this we downloaded the assembly that was deposited at NCBI Assembly under accession GCA_003957625.175. The downloaded contigs (2714 in total) were analysed with our workflow, namely:

1. Contigs were submitted to homology searches against the combined nucleotide database (nt16SLep) using BLASTN (Altschul, Gish, Miller, Myers, & Lipman, 1990) with a 1e-50 cutoff E-value, and against the protein database (nr) using BLASTX (Altschul et al., 1990) with a 1e-17 cutoff E-value.

2. The output files from both homology searches were processed with MEGAN (Huson, Mitra, Ruscheweyh, Weber, & Schuster, 2011). We then exported the taxonomic and functional assignments performed by MEGAN for each contig using a MEGAN functionality.

3. The output files from both homology searches were also processed with a custom bash script to generate two files (one for each homology search) containing the name of each contig, its best hit (or no hit) and the corresponding E-value.

4. The information from the exported MEGAN files and the bash script output files was then used to create a local SQLite database, which included all the available information for each contig (from BLASTN and from BLASTX).

5. Various SQLite commands were then executed to define the taxonomic profile of the sample:

Taxonomical assignment:

1) Contigs with hits in the nt16SLep search that had E-value 0.0, were directly assigned to that taxon.

2) The taxonomical assignment for the rest of the contigs was done by comparing the results from both homology searches following the LCA logic, *i.e.*, the level of taxonomic assignment was the lowest one found in common for both results, or for the only result if it returned no hits in the other homology search.

3) Contigs that were not assigned to any taxon by any of the homology searches were classified as “not assigned”; contigs that returned no hits in both searches were considered as “no hits”.

Table S2 shows all the results that we obtained for the synthetic metagenome that were compiled by our workflow and used to define its taxonomic profile. Summarising, of the total BMock12 contigs (2714), 1726 showed hits in the BLASTN (BN) search, and 988 showed no significant BN hits; whereas 2240 showed significant hits in the BLASTX (BX) search, and 474 showed no BX hits. After integrating the BN and BX results with our workflow, a total of 2368 contigs were taxonomically assigned and 346 contigs were not assigned (NA) (331 corresponded to BN and BX no hits, 13 NA contigs with BLASTX hits, and 2 NA contigs with BN and BX hits) (Table S2). The 2368 contigs were assigned up to the following taxonomical level (Table S3): 51 to Domain; 62 to Phylum; 142 to Class; 14 to Order; 110 to Family; 1597 to Genus; and 392 to Species.

We contrasted our results with those reported by Sevim *et al*. (2019) (Table S4) and found that our workflow identified all the members of the mock metagenome. Moreover, the number of contigs that we identified *per* community member was greater (or the same, but never lower) than what the authors reported (Table S4). For example, Sevim and coauthors identified 23 *Cohaesibacter* sp. ES.047 contigs, whereas we identified 82 *Cohaesibacter* sp. ES.047 contigs (Table S4). Furthermore, Sevim *et al.* assigned 213 contigs to the synthetic metagenome and reported 239 contigs that were not aligned (in total 452 of the total 2714 contigs), whereas we were able to assign 309 contigs to the synthetic metagenome at the species level, and 1960 contigs at the genus level (Table S4). Among others, these differences could be due 1) to the databases (we used September 2019 databases whereas Sevim *et al.* used a database from June 2017), and 2) we contrasted results from both homology searches (BN and BX), whereas Sevim and colleagues reported the results from one homology search (BN). In conclusion, our workflow enabled us to identify all the community members of the mock metagenome with greater sensitivity than what was previously reported.
